# Supplementary material
Source: HighWire-hosted journal article supplement (https://www.cmajopen.ca/highwire/filestream/90351/field_highwire_adjunct_files/2/open-2022-0163-original-submission.pdf)
Supplement: open-2022-0163-original-submission.pdf [file open-2022-0163-original-submission.pdf]

1  
2  
3 **Title:** Evaluating the Prevalence of Lipid Assessments in Children in Alberta, Canada  
4

5 **Authors:** Christian S<sup>1</sup>, Ridsdale R<sup>1</sup>, Mu L<sup>2</sup>, Khoury, M<sup>1</sup>  
6

7 **Affiliation:**

8 <sup>1</sup>University of Alberta, Edmonton, AB

9 <sup>2</sup>Alberta Health Services, Edmonton, AB  
10

11  
12 **Corresponding Author:**

13 Susan Christian, MSc PhD CGC

14 Department of Medical Genetics

15 University of Alberta

16 826 Medical Sciences Building, University of Alberta

17 Edmonton, Alberta T6G 2H7

18 t) 780-407-1015/ f) 780-407-1761

19 Email: smc12@ualberta.ca

20 ORCID: 0000-0001-5248-3049  
21

22 **Competing interests:** The authors have no competing interest.  
23

24 **Funding:** The authors received no direct financial support for this study.  
25

26  
27  
28  
29 **Words:** 2626  
30

31 **Keywords:** Familial hypercholesterolemia; lipid screening; Canada; pediatric  
32  
33  
34  
35  
36  
37  
38  
39  
40  
41  
42  
43  
44  
45  
46  
47  
48  
49  
50  
51  
52  
53  
54  
55  
56  
57  
58  
59  
60

## Abstract

**Background:** Familial hypercholesterolemia (FH) is common, inherited, life-threatening, and treatable. It is characterized by marked elevations of low-density lipoprotein-cholesterol (LDL-C) resulting in a high risk of cardiovascular disease. Early diagnosis is paramount and treatment starting in childhood dramatically reduces the risk of cardiovascular disease. We sought to evaluate the prevalence of pediatric lipid assessments in Albertan children.

**Method:** Laboratory and administrative data from Alberta Health were reviewed between April 1, 2012 and December 31, 2021. Two separate pediatric cohorts were evaluated to allow for longitudinal assessments throughout the pediatric period (2-18 years old). Annual lipid assessment frequencies were also reviewed for all children (2-18 years) between 2013 and 2021.

**Results:** Pediatric lipid assessments were performed in 4.3% (1,972/46,170) of children between 2 and <11 years old and 20% (8,158/40,926) of children between 9 and <18 years. Female children ages 2- <11 years old (odds ratio (OR) 0.8, 95% confidence interval (CI) 0.69, 0.83) and those living in rural communities (OR 0.6, 95% 0.48, 0.66 for 2 - <11 year olds; OR 0.6, 95% CI 0.55, 0.65 for 9 - <18 year olds) were significantly less likely to have a lipid assessment, compared with male children and those in non-rural communities, respectively. Among those with lipid assessments, 1.2% (109/9,353) had an LDL-C level suggestive of probable FH ( $\geq 4.0$  mmol/L). Statin therapy was prescribed in 16 children total during the study period. The frequency of lipid assessments was relatively stable with the exception of a decrease in 2020 (range 10,318 to 15,639 assessments per year).

**Interpretation:** Pediatric lipid assessment rates in Alberta is sub-optimal. These findings highlight the need to increase awareness of the benefits of early diagnosis and treatment of FH with regard to long-term health as well as identify and overcome barriers to diagnosis and treatment.

## Introduction

Pediatric lipid screening is a simple and effective tool to identify children with inherited lipid disorders, such as familial hypercholesterolemia (FH).(1) FH is an autosomal co-dominant, life-threatening, and treatable disease characterized by lifelong marked elevations of low-density lipoprotein cholesterol (LDL-C). If untreated, individuals with FH have an 18-fold increased risk of cardiovascular disease.(2) Early diagnosis is paramount and treatment starting in childhood dramatically reduces atherosclerotic progression and subsequent risk for manifesting cardiovascular disease.(3) To this end, U.S.-based recommendations from the National Heart, Lung, and Blood Institute and endorsed by the American Academic of Pediatrics recommend universal lipid screening for children 9-11 years and again between 17-21 years.(4) However, research has shown that less than 10% of individuals with FH are diagnosed and less than 5% of Canadian pediatricians report routinely performing lipid assessments on healthy children.(1,5) Rather, lipid assessments are more often performed in the presence of other identified cardiovascular risk factors, such as obesity.(5) The real-world practice patterns of primary care physicians (including family physicians) with respect to pediatric lipid assessments of Canadian youth require evaluation in order to gain insights regarding the current detection of FH and other inherited lipid disorders in youth. Thus, we sought to evaluate the prevalence of pediatric lipid assessments in Albertan children, and factors associated with lipid assessments, using data available from Alberta Health.

## Methods

### *Data Sources and Cohorts*

Data were retrieved from five Alberta Health databases including the Provincial Registry, the Lab Database, the Pharmaceutical Information Network, Connect Care, Discharge Abstract Database, and the National Ambulatory Care Reporting System. Individuals are assigned a unique ID number that permits linking across the databases. Children were excluded from all data sets if they had an underlying diagnosis that would predispose them to routine lipid screening independent of universal screening practices based on ICD-10 codes. Diagnoses excluded are provided in Supplementary Table 1.(4) All data were de-identified and Research Ethics Board approval was obtained through the University of Alberta.

Administrative, pharmaceutical and laboratory data, including lipid parameters, were included between April 1, 2012 (onset of data availability) and December 31, 2021. Two separate pediatric cohorts were evaluated to allow for longitudinal assessments throughout the pediatric period within the available data timeline. The first cohort ("cohort 1") comprised Albertan children born between April 1, 2010 and December 31, 2010 (longitudinal follow-up from 2 to <11 years) and the second cohort ("cohort 2") comprised Albertan children born between April 1, 2003 and December 31, 2003 (longitudinal follow-up from 9 to <18 years). Lipid panel data were evaluated, including total cholesterol, LDL-C, high-density lipoprotein cholesterol (HDL-C), non-HDL-C, and triglycerides. Sex, residence (rural vs non-rural), age at lipid panel assessment, and initiation, age and type of statin treatment were also collected. Annual lipid assessment trends (i.e. the total number of pediatric lipid assessments per year) were also reviewed between January 1, 2013 to December 31, 2021 for Albertan children 2 years to <18 years.

### *Data analysis*

1  
2  
3 Continuous variables were presented as means with standard deviations. Categorical variables were  
4 presented as counts and percentages. Lipid assessment was defined as the reporting of an LDL-C and/or  
5 total cholesterol value. The presence of a lipid assessment was evaluated based on sex, age, and  
6 residence (rural vs non-rural) using logistic regression or Pearson correlation. Rural was defined by a  
7 zero in the second character of the postal code.(6) An LDL-C level of  $\geq 4.0$  mmol/L was considered  
8 indicative of severe hypercholesterolemia or probable FH based on the simplified Canadian definition  
9 for familial hypercholesterolemia.(7) A total cholesterol level of  $\geq 5.2$  mmol/L was considered  
10 abnormal.(4) Statistical analyses were performed on Stata 17.0.(8) Due to the large sample size, a p-  
11 value of  $< 0.0001$  defined statistical significance.  
12  
13

## 14 15 **Results**

16  
17 The study cohorts included 46,170 children followed from 2 to  $< 11$  years old (cohort 1) and 40,926  
18 children followed from 9 to  $< 18$  years old (cohort 2). Children with a diagnosis that may influence lipid  
19 metabolism (Supplementary Table 1) were excluded ( $n = 346$  and  $n = 455$  in cohorts 1 and 2,  
20 respectively).  
21

22 Demographic data for each cohort is described in Table 1. At least one lipid assessment was performed  
23 on 4% ( $n = 1,972$ ) of children in cohort 1 and 20% ( $n = 8,158$ ) of children in Cohort 2. Male children in  
24 cohort 1 had 1.3 (95% CI 1.20, 1.45;  $p < 0.0001$ ) times increased odds of having a lipid assessment  
25 compared with females, whereas male children in cohort 2 had 0.9 (95% CI 0.86, 0.95;  $p < 0.0001$ ) times  
26 decreased odds of having an assessment compared with females. Children living in rural Alberta in both  
27 cohorts were less likely to have a lipid assessment compared to children living in non-rural communities  
28 (cohort 1: OR 0.56; 95% CI 0.48, 0.66;  $p < 0.0001$  and cohort 2: OR 0.6; 95% CI 0.55, 0.65;  $p < 0.0001$ ).  
29  
30

31 Lipid assessment results are shown in Table 2. Overall, 7% ( $n=112$ ) of 1,723 children in cohort 1 and 7%  
32 ( $n=448$ ) of 7,185 children in cohort 2 that had a total cholesterol value had a result  $\geq 5.2$  mmol/L. In  
33 addition, 1% ( $n=23$ ) of 1,836 children in cohort 1 and 1% ( $n=86$ ) of 7,517 children in cohort 2 that had an  
34 LDL-C value, had a result  $\geq 4.0$  mmol/L.  
35  
36

37 Three children in cohort 1 with LDL-C levels  $\geq 4.0$  mmol/L were prescribed a statin (1 atorvastatin and 2  
38 rosuvastatin). Thirteen children in cohort 2 were prescribed a statin, 8 of these children had an LDL-C  $\geq 4$   
39 mmol/L within the study period and 1 child had no LDL-C value reported but had a total cholesterol level  
40 of 5.14 mmol/L. Although 4 children that were prescribed statins had initial LDL-C levels  $< 4.0$  mmol/L  
41 and total cholesterol levels  $< 5.2$  mmol/L, the date of the statin prescription was several years after the  
42 initial lipid assessment was performed. Follow-up lipid assessment data were not available as part of  
43 this study and as such the LDL-C values at the time of statin prescription are not known for these  
44 children. The most common statin prescribed was atorvastatin ( $n=8$ ) followed by rosuvastatin ( $n=3$ ),  
45 simvastatin ( $n=1$ ) and lovastatin (1).  
46  
47  
48

49 Lipid assessments increased with age in both cohorts (Pearson correlation: 0.96;  $p < 0.0001$  and 0.97;  
50  $p < 0.0001$  for cohort 1 and 2, respectively) and ranged from 0.1% of 2-year-old children to 3.9% of 17-  
51 year-old adolescents (Figure 2). There was a 2-year overlap in age between the two cohorts when  
52 children were 9 and 10 years of age. Children in cohort 1 were 9 and 10 years of age in 2020 and 2021  
53 and children in cohort 2 were 9 and 10 years of age in 2012 and 2013. Of 9-year-old children, 0.73%  
54 ( $n=338$ ) in cohort 1 had a lipid assessment compared to 1.02% ( $n=419$ ) of 9-year-old children in cohort 2,  
55 whereas, 1.15% ( $n=532$ ) of 10-year-old children in cohort 1 had a lipid assessment compared to 1.07%  
56  
57  
58  
59  
60

1  
2  
3 (n=436) of 10-year-old children in cohort 2. The difference between cohorts was significant for 9-year-  
4 old children (OR 0.71; 95% CI 0.61, 0.81;  $p < 0.0001$  for cohort 1 compared with cohort 2) but not for 10-  
5 year-old children (OR: 1.07; 95% CI 0.94, 1.21  $p = 0.33$  for cohort 1 compared with cohort 2).  
6

7  
8 A total of 117,130 initial lipid assessments were performed in children between the ages of 2 and 18  
9 years between January 1, 2013 and December 31, 2021. Lipid assessment rates were relatively constant  
10 overtime time with the exception of slightly less lipid screening in 2020, followed by a return to  
11 assessment rates in keeping with prior years in 2021 (Figure 2).  
12

### 13 **Interpretation**

14  
15 Inherited lipid disorders such as FH are common and are typically clinically silent throughout  
16 childhood.(9) Thus, systematic strategies that incorporate universal, targeted, and cascade screening are  
17 needed to optimize the detection of cases.(10) The findings in this study indicate that lipid assessments  
18 are infrequently and sub-optimally utilized in the care of Albertan children; only 4% of children had a  
19 lipid assessment performed between 2 to <11 years and 20% of children had a lipid assessment  
20 performed between 9 to <18 years. Approximately 1% of children that had a lipid assessment  
21 performed had an LDL-C level that was severely elevated and suspicious of FH, however, very few  
22 children were prescribed statin therapy. These findings highlight the need for dedicated strategies to  
23 promote the early and systematic detection of inherited lipid disorders in Canadian children and to  
24 incorporate support systems to facilitate the evidence-based treatment of identified cases.  
25  
26

27  
28 The finding of infrequent lipid assessments in the first decade of life is well aligned with previous work.  
29 For example, Khoury et al., in a survey administered through the Canadian Pediatric Surveillance  
30 Program, demonstrated that only about 3% of Canadian pediatricians who provide primary care  
31 reported performing lipid screening on otherwise healthy 9 to 11 year old children most/all of the  
32 time.(5) Although, to the best of the authors' knowledge, there are no other evaluations of lipid  
33 assessment rates in Canadian children, evaluations of U.S. children have similarly demonstrated sub-  
34 optimal lipid screening practices. While some evaluations of US screening rates have identified rates of  
35 ~20%(11,12), other analyses have identified lower screening rates in otherwise healthy children of 2-  
36 7%.(13–16) Given that we were unable to evaluate the indication for screening in the present study, the  
37 true universal screening frequency cannot be inferred, but likely comprises a small fraction of the 4% of  
38 2-11 year-old Albertan children who received a lipid assessment. Assessments may have been  
39 performed in large part due to other cardiovascular risk factors or the diagnosis of dyslipidemia or  
40 premature cardiovascular disease in family members, as suggested by current guidelines.(10) Supporting  
41 this, lipid assessment frequencies increased gradually with age, from 0.09% in 2-year-olds to 3.9% in 17-  
42 year-olds, suggesting that assessments may have been performed due to the presence of other  
43 identified risk factors which accumulated with time. Further supporting the hypothesis that many of the  
44 assessments performed were targeted on the basis of dyslipidemia risk factors rather than universal  
45 screening is the finding that assessments were more common in males compared to females between  
46 the ages of 2-11 years. The 1.3 increased odds of a lipid assessment in males relative to females may be  
47 related to the increased prevalence of obesity (which in turn may trigger lipid assessments) in school-  
48 aged males compared with females.(17,18) Conversely, for children and adolescents between 9-18 years  
49 of age, females had slightly increased odds of receiving a lipid assessment compared with males (OR  
50 0.9). The cause for this slight difference is not known, but may be due in part to unidentified screening  
51 that may have occurred at earlier time points (<9 years old). Prior work evaluating U.S. children did not  
52  
53  
54  
55  
56  
57  
58  
59  
60

1  
2  
3 identify a difference in lipid screening rates between male and female children(13,16), while other work  
4 has demonstrated increased odds of screening in males.(15) Further studies are needed to explore  
5 factors that may contribute to the lipid assessment gender disparities observed in the first decade of  
6 life.  
7

8  
9 Further compounding the finding of sub-optimal lipid assessments was the observation that children  
10 residing in rural communities undergo less frequent assessments compared with their urban  
11 counterparts. This may be due to a lack of access to primary care in geographically dispersed and under-  
12 resourced locations. Prior work has similarly demonstrated that limitations of access to care naturally  
13 impede routine health assessments, including pediatric lipid assessments. For example, Sriram et al.  
14 previously demonstrated that, in children in Olmstead County, Minnesota, children with government  
15 health insurance policies had an adjusted OR of 0.47 (95% CI 0.41, 0.53) to receive a pediatric lipid  
16 assessment, compared with children with private health insurance.(16) Moreover, children with no  
17 insurance at all had an OR of 0.14 (95% CI 0.10, 0.21). Conversely, an analysis of commercial and  
18 Medicaid insurance claims of a representative US sample did not demonstrate a difference in lipid  
19 screening rates based on census region, race, ethnicity, or insurance type.(12) Further assessments  
20 evaluating impediments to access of care for Canadian children are needed.  
21  
22

23  
24 We leveraged an overlap of ages between cohorts 1 and 2 (9 and 10 year old children) to evaluate  
25 changes in lipid assessment practices between the cohort periods (2012-2013 for cohort 2 vs 2020-2021  
26 for cohort 1). We found that lipid assessment practices were significantly lower for 9-year old children in  
27 2020 compared with 9-year old children in 2012. Conversely, lipid assessment practices for the 10- year-  
28 old children were no different between 2021 and 2013. The lower number of assessments in 2020 may  
29 have been due in part to the impact from the COVID-19 pandemic and decreased health care  
30 assessments during this period. Supporting this was our finding that lipid assessment frequency by year  
31 was relatively consistent between 2013-2019 and then decreased in 2020 (Figure 2). Fortunately, lipid  
32 assessments increased again in 2021. However, the findings in this study indicate that Canadian lipid  
33 assessment practices have generally not changed in the last 8 years.  
34  
35

36  
37 Of children who underwent screening, about 1% in both cohorts had an LDL-C value  $\geq 4$  mmol/L (109  
38 children and adolescents in total). In childhood, an LDL-C of  $\geq 4$  mmol/L corresponds with a high  
39 likelihood of FH, and is used in the simplified Canadian definition of FH incorporated by Ruel et al.(7)  
40 Despite this, and evidence supporting the beneficial long-term effects of early treatment for youth with  
41 FH(3,19,20), only 16 children across the two cohorts were prescribed statin therapy. This highlights the  
42 need to not only incorporate strategies to improve widespread pediatric lipid screening strategies, but  
43 also implement strategies to facilitate recognition and timely management of abnormal findings.  
44  
45

### 46 **Limitations**

47  
48 While this study represents the first evaluation of pediatric lipid assessment practices within a Canadian  
49 context, certain limitations should be considered. First, while we were able to comprehensively assess  
50 lipid assessments in Albertan children, this may not be representative of assessment patterns in other  
51 provinces or territories across Canada. In addition, we were unable to evaluate longitudinal lipid  
52 assessment patterns across the full pediatric age range (2-18 years old). Therefore, we generated two  
53 cohorts within the available data period to evaluate screening practices between 2-<11 years old and 9-  
54 <18 years old. This approach did, however, provide the distinct advantage of permitting overlap of 9-  
55 and 10-year-old children to evaluate for an era effect. We were unable to assess the reason for lipid  
56  
57  
58  
59  
60

assessments. While patients with conditions known to be associated with dyslipidemia were excluded from this analysis, we were unable to ascertain if a lipid panel was performed as part of universal screening practices or due to the presence of cardiovascular risk factors, such as obesity, or the presence of a positive family history. While we may infer that most lipid assessments were targeted in nature rather than universal for reasons outlined above, we cannot be certain and further study is required. We were unable to assess if children had screening performed outside the available data period (<2 years old in cohort 1 and <9 years old in cohort 2). While our trends suggest that screening children <2 years old may have been quite rare, it is possible that children in cohort 2 had assessments prior to their 9<sup>th</sup> birthday and were not captured as having been screened. Finally, we did not evaluate repeated assessments of dyslipidemia over time. Therefore, the true prevalence of dyslipidemia, as well as responses to therapy cannot be determined from the available data.

### Conclusion

Pediatric lipid assessments for Albertan children and adolescents are sub-optimal, particularly in the first decade of life and in children living in rural communities. Assessment practices have not changed substantially in the last 8 years, apart from a noticeable decrease in assessments in 2020. Children identified to have severe dyslipidemia appear to be under treated, though further evaluation of this population of children on a more granular level is needed. In order to optimize the primary prevention of cardiovascular disease, it is imperative that strategies are incorporated to improve the detection and management of children with dyslipidemia, particularly those children with inherited lipid disorders.

### References

1. Wiegman A, Gidding SS, Watts GF, Chapman MJ, Ginsberg HN, Cuchel M, et al. Familial hypercholesterolaemia in children and adolescents: gaining decades of life by optimizing detection and treatment. *Eur Heart J*. 2015 Sep;36(36):2425–37.
2. Hu P, Dharmayat KI, Stevens CAT, Sharabiani MTA, Jones RS, Watts GF, et al. Prevalence of Familial Hypercholesterolemia Among the General Population and Patients With Atherosclerotic Cardiovascular Disease: A Systematic Review and Meta-Analysis. *Circulation*. 2020 Jun;141(22):1742–59.
3. Luirink IK, Wiegman A, Kusters DM, Hof MH, Groothoff JW, de Groot E, et al. 20-Year Follow-up of Statins in Children with Familial Hypercholesterolemia. *N Engl J Med*. 2019 Oct;381(16):1547–56.
4. Expert panel on integrated guidelines for cardiovascular health and risk reduction in children and adolescents: summary report. *Pediatrics*. 2011 Dec;128 Suppl(Suppl 5):S213-56.
5. Khoury M, Rodday AM, Mackie AS, Gill P, McLaughlin T, Harris KC, et al. Pediatric Lipid Screening and Treatment in Canada: Practices, Attitudes, and Barriers. *Can J Cardiol*. 2020 Sep;36(9):1545–9.
6. Canada Post. Addressing Guidelines [Internet]. Available from: <https://www.canadapost-postescanada.ca/cpc/en/support/articles/addressing-guidelines/postal-codes.page>
7. Ruel I, Brisson D, Aljenedil S, Awan Z, Baass A, Bélanger A, et al. Simplified Canadian Definition for Familial Hypercholesterolemia. *Can J Cardiol*. 2018 Sep;34(9):1210–4.
8. Stata Corp (2017) Stata Statistical Software: Release 15. College Station, TX: StataCorp LLC.

- 1
  - 2
  - 3
  - 4
  - 5
  - 6
  - 7
  - 8
  - 9
  - 10
  - 11
  - 12
  - 13
  - 14
  - 15
  - 16
  - 17
  - 18
  - 19
  - 20
  - 21
  - 22
  - 23
  - 24
  - 25
  - 26
  - 27
  - 28
  - 29
  - 30
  - 31
  - 32
  - 33
  - 34
  - 35
  - 36
  - 37
  - 38
  - 39
  - 40
  - 41
  - 42
  - 43
  - 44
  - 45
  - 46
  - 47
  - 48
  - 49
  - 50
  - 51
  - 52
  - 53
  - 54
  - 55
  - 56
  - 57
  - 58
  - 59
  - 60
9. de Ferranti SD, Steinberger J, Ameduri R, Baker A, Gooding H, Kelly AS, et al. Cardiovascular Risk Reduction in High-Risk Pediatric Patients: A Scientific Statement From the American Heart Association. *Circulation*. 2019 Mar;139(13):e603–34.
10. Bamba V. Update on screening, etiology, and treatment of dyslipidemia in children. *J Clin Endocrinol Metab*. 2014 Sep;99(9):3093–102.
11. Wilson DP, Davis S, Matches S, Shah D, Leung-Pineda V, Mou M, et al. Universal cholesterol screening of children in community-based ambulatory pediatric clinics. *J Clin Lipidol*. 2015;9(5 Suppl):S88-92.
12. Berger JH, Chen F, Faerber JA, O’Byrne ML, Brothers JA. Adherence with lipid screening guidelines in standard- and high-risk children and adolescents. *Am Heart J*. 2021 Feb;232:39–46.
13. Mihalopoulos NL, Stipelman C, Hemond J, Brown LL, Young PC. Universal Lipid Screening in 9- to 11-Year-Olds Before and After 2011 Guidelines. *Acad Pediatr*. 2018 Mar;18(2):196–9.
14. Valle CW, Binns HJ, Quadri-Sheriff M, Benuck I, Patel A. Physicians’ Lack of Adherence to National Heart, Lung, and Blood Institute Guidelines for Pediatric Lipid Screening. *Clin Pediatr (Phila)*. 2015 Oct;54(12):1200–5.
15. Herrington L, Susi A, Gorman G, Nylund CM, Hisle-Gorman E. Factors Affecting Pediatric Dyslipidemia Screening and Treatment. *Clin Pediatr (Phila)*. 2019 May;58(5):502–10.
16. Sriram S, St Sauver JL, Jacobson DJ, Fan C, Lynch BA, Cristiani V, et al. Temporal trends in lipid testing among children and adolescents: A population based study. *Prev Med reports*. 2017 Dec;8:267–72.
17. Carsley S, Pope EI, Anderson LN, Tremblay MS, Tu K, Birken CS. Temporal trends in severe obesity prevalence in children and youth from primary care electronic medical records in Ontario: a repeated cross-sectional study. *C open*. 2019;7(2):E351–9.
18. Rodd C, Sharma AK. Recent trends in the prevalence of overweight and obesity among Canadian children. *C Can Med Assoc J = J l’Association medicale Can*. 2016 Sep;188(13):E313–20.
19. Vuorio A, Kuoppala J, Kovanen PT, Humphries SE, Tonstad S, Wiegman A, et al. Statins for children with familial hypercholesterolemia. *Cochrane database Syst Rev*. 2017 Jul;7(7):CD006401.
20. Braamskamp MJAM, Langslet G, McCrindle BW, Cassiman D, Francis GA, Gagne C, et al. Effect of Rosuvastatin on Carotid Intima-Media Thickness in Children With Heterozygous Familial Hypercholesterolemia: The CHARON Study (Hypercholesterolemia in Children and Adolescents Taking Rosuvastatin Open Label). *Circulation*. 2017 Jul;136(4):359–66.



**Table 1: Demographic data for each cohort**

| Characteristics        | Cohort 1 (2-<11 years) |                     | Cohort 2 (9-<18 years) |                     |
|------------------------|------------------------|---------------------|------------------------|---------------------|
|                        | <i>Screening</i>       | <i>No screening</i> | <i>Screening</i>       | <i>No screening</i> |
| Total children         | 1,972 (4%)             | 44,198 (96%)        | 8,158 (20%)            | 32,768 (80%)        |
| Male                   | 1,146 (58%)            | 21,546 (49%)        | 4,024 (49%)            | 16,992 (52%)        |
| Female                 | 826 (42%)              | 22,652 (51%)        | 4,134 (51%)            | 15,776 (48%)        |
| Rural                  | 177 (9%)               | 6,585 (15%)         | 863 (11%)              | 5,429 (17%)         |
| Non rural              | 1,795 (91%)            | 37,611 (85%)        | 7,195 (89%)            | 27,339 (83%)        |
| Age at lipid screening | 7.70 (2.15) years      | N/A                 | 12.19 (2.37) years     | N/A                 |

Confidential

**Table 2: Summary of lipid screening results**

| <b>Lipid screening results</b>              | <b>Cohort 1 (2-&lt;11 years)</b> | <b>Cohort 2 (9-&lt;18 years)</b> |
|---------------------------------------------|----------------------------------|----------------------------------|
| Mean Total cholesterol                      | 4.01 (0.78) mmol/L               | 3.96 (0.79) mmol/L               |
| Mean LDL cholesterol                        | 2.21 (0.69) mmol/L               | 2.15 (0.67) mmol/L               |
| Mean HDL cholesterol                        | 1.35 (0.59) mmol/L               | 1.29 (0.31) mmol/L               |
| Mean Non-HDL cholesterol                    | 2.74 (0.76) mmol/L               | 2.67 (0.78) mmol/L               |
| Mean Triglycerides                          | 1.18 (0.78) mmol/L               | 1.16 (0.70) mmol/L               |
| Children with Total cholesterol >5.2 mmol/L | 112 (7%)                         | 448 (6%)                         |
| Children with LDL cholesterol >3.4 mmol/L   | 85 (4%)                          | 296 (4%)                         |
| Children with LDL cholesterol >4.0 mmol/L   | 23 (1%)                          | 86 (1%)                          |
| Children with LDL cholesterol >5.0 mmol/L   | 7 (0.4%)                         | 18 (0.2%)                        |
| Statin prescribed                           | 3                                | 13                               |

Confidential

**Supplementary Table 1: Diagnoses excluded from analysis due to increased risk of dyslipidemia based on ICD codes**

| Diagnosis                     |
|-------------------------------|
| Hypothyroidism                |
| Diabetes                      |
| Chronic kidney disease        |
| Hemolytic uremic syndrome     |
| Nephrotic syndrome,           |
| Alagille syndrome             |
| Systemic lupus erythematosus  |
| Juvenile rheumatoid arthritis |
| Glycogen-storage disease      |
| Gaucher disease               |
| Cystine-storage disease       |
| Juvenile Tay-Sachs disease,   |
| Niemann-Pick disease          |
| Organ transplantation         |
| Progeria                      |
| Childhood cancer              |

1  
2  
3  
4  
5  
6  
7  
8  
9  
10  
11  
12  
13  
14  
15  
16  
17  
18  
19  
20  
21  
22  
23  
24  
25  
26  
27  
28  
29  
30  
31  
32  
33  
34  
35  
36  
37  
38  
39  
40  
41  
42  
43  
44  
45  
46  
47  
48  
49  
50  
51  
52  
53  
54  
55  
56  
57  
58  
59  
60

**Figure 1:** Percent of initial lipid assessments performed based on age

**Figure 2:** Number of lipid assessments performed for children 2-18 years of age over time

Confidential

1  
2  
3  
4  
5  
6  
7  
8  
9  
10  
11  
12  
13  
14  
15  
16  
17  
18  
19  
20  
21  
22  
23  
24  
25  
26  
27  
28  
29  
30  
31  
32  
33  
34  
35  
36  
37  
38  
39  
40  
41  
42  
43  
44  
45  
46  
47  
48  
49  
50  
51  
52  
53  
54  
55  
56  
57  
58  
59  
60

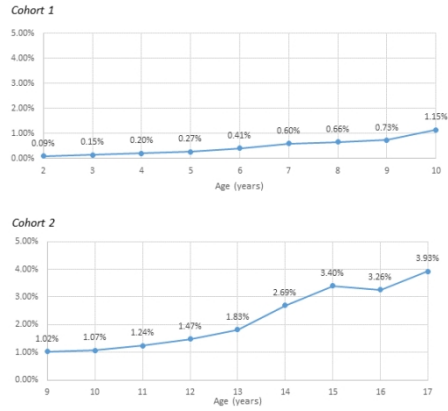

Percent of initial lipid assessments performed based on age

855x481mm (38 x 38 DPI)

1  
2  
3  
4  
5  
6  
7  
8  
9  
10  
11  
12  
13  
14  
15  
16  
17  
18  
19  
20  
21  
22  
23  
24  
25  
26  
27  
28  
29  
30  
31  
32  
33  
34  
35  
36  
37  
38  
39  
40  
41  
42  
43  
44  
45  
46  
47  
48  
49  
50  
51  
52  
53  
54  
55  
56  
57  
58  
59  
60

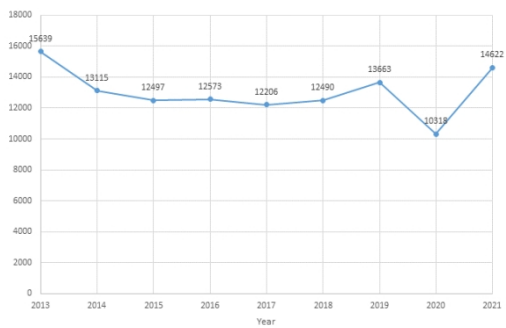

Number of lipid assessments performed for children 2-18 years of age over time

855x481mm (38 x 38 DPI)
